# Supplementary material
Source: Springer Nature journal article supplement (https://www.springermedizin.de/resource/supplementary/12885_2010_2697_MOESM6_ESM.pdf/9461742)
Supplement: MOESM6 [file 9461742]

Glucose

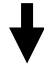

HIF-1 deficient c4 tumor.  
AMP/ATP=0.41

WT tumor.  
AMP/ATP=0.09

GLUT-1,2,3

Glucose

Hexokinase-2

Phosphoglucose isomerase

Phosphofructokinase-1

Aldolase 49%

Triose phosphate isomerase 68%

Glyceraldehyde-3-phosphate dehydrogenase 74%

Phosphoglycerate kinase 53%

Phosphoglycerate mutase 69%

Enolase 74%

Pyruvate kinase 59%

Lactate dehydrogenase 42%

Lactate

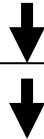

Lactate

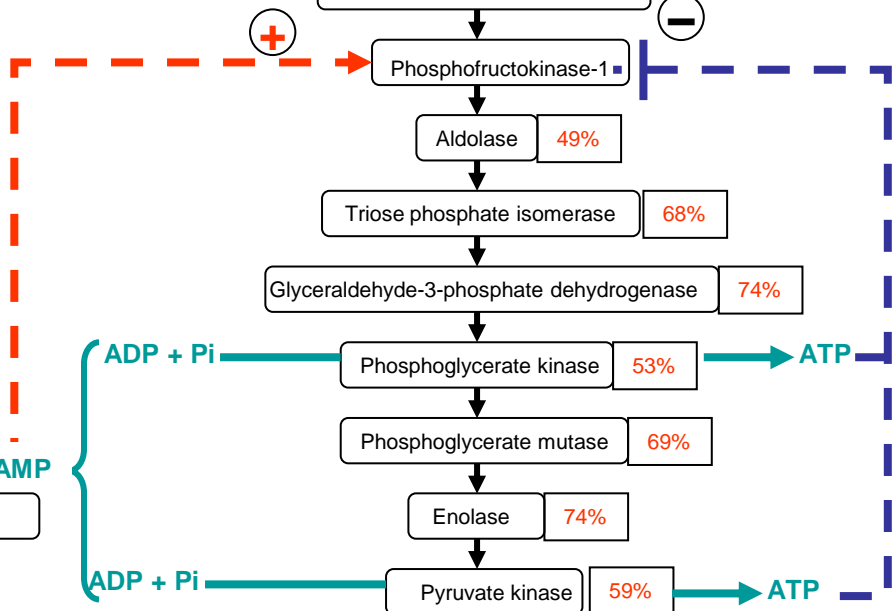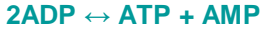

Adenylate kinase
